# Supplementary material for: Safety and Activity of the Combination of Ceritinib and Dasatinib in Osteosarcoma
Source: MDPI journal article supplement (doi:10.3390/cancers12040793), 2020-03-26
Supplement: s1 [file s1]

## Supplementary Materials:

a

|                         | Analysis on paraffin embedded primary OS cells | Staining                   | Immunocytochemistry  | No 386        | No 403        |
|-------------------------|------------------------------------------------|----------------------------|----------------------|---------------|---------------|
|                         |                                                |                            |                      |               |               |
| Cytology                | Cell density                                   | HE (Hematoxylin and eosin) |                      | moderate      | moderate      |
|                         | Cell atypia                                    | HE                         |                      | present       | present       |
|                         | Osteoid formation                              | Goldner                    |                      | present       | Not present   |
| Lineage differentiation | Mesenchymal Cell                               |                            | Vimentin             | High positive | High positive |
|                         | Endothelium                                    |                            | CD31                 | negative      | negative      |
|                         | Smooth muscle                                  |                            | Actin                | negative      | negative      |
|                         | Striated muscles                               |                            | Desmin               | negative      | negative      |
|                         | Macrophages                                    |                            | CD68                 | negative      | negative      |
|                         | Pan leukocytes                                 |                            | CD45                 | negative      | negative      |
|                         | Epithelium                                     |                            | Cytokeratin (MNF)    | negative      | negative      |
|                         |                                                |                            | Cytokeratin (AE 1/3) | negative      | negative      |
|                         |                                                |                            | Cytokeratin (OSCAR)  | negative      | negative      |
|                         |                                                |                            |                      |               |               |

b

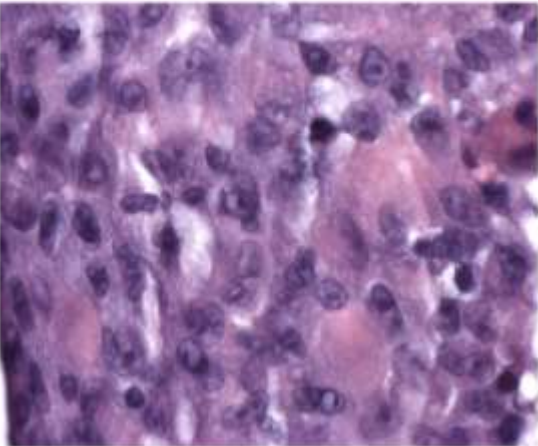

c



**Figure S1.** Morphological and immunocytochemical characterization of primary OS cells. (a) Strategy used to characterize the primary OS cells. Results for samples no 386 and no 403 are shown. (b) HE Staining ( $\times 630$ ) and (c) Vimentin staining ( $\times 630$ ) of sample no 386.

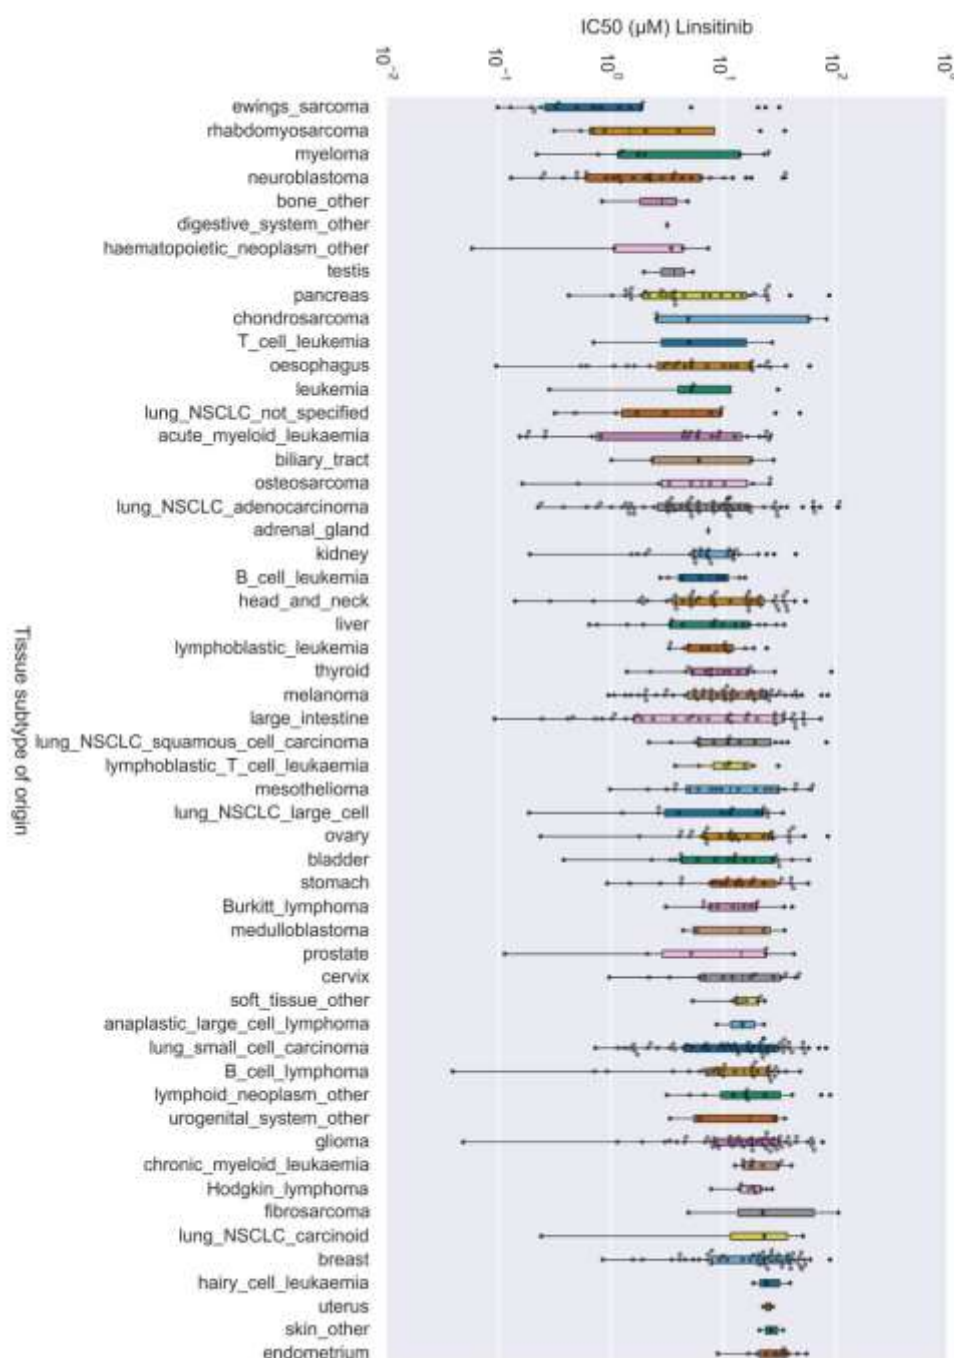

**Figure S2.** IC<sub>50</sub> of Linsitinib in Cell lines. Boxplot (colored) and the corresponding swarmplot (Grey dots) in the background. Black dots indicate outliers. The axis on top shows the molarity needed to reach a half maximal inhibitory concentration (IC<sub>50</sub>). The Tissue sub-types are in order of their median, from smallest to greatest. A small IC<sub>50</sub> indicating a strong impact of the tested compound (Linsitinib) on the cell growth of all tested cell lines. The plot was produced with a Python package called Seaborn. The data was taken from the GDSC (Genomics of Drug Sensitivity in Cancer) Screening Set 1 of the Cancer genome Project at the Wellcome Sanger Institute and the Center for Molecular Therapeutics at the Massachusetts General Hospital Cancer Center. Information on the Screenings workflow and the established cell lines can be found at <https://www.cancerrxgene.org/>.

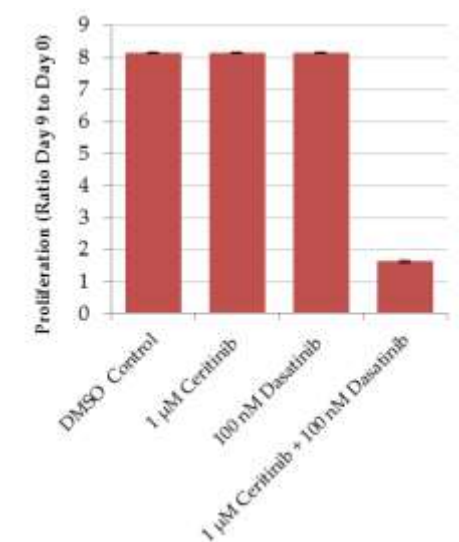

**Figure S3.** Effect of ceritinib and dasatinib on the proliferation of the primary tumor cells no 403. The primary tumor cells of sample 403 were incubated with the indicated inhibitors. After nine days, the cell proliferation was measured and the ratio between the absorbance at day 9 and the absorbance at day 0 was calculated. The proliferation experiments were carried out in biological duplicates. Data are represented as the mean  $\pm$  Standard deviation (SD).

**Table S1.** Analysis performed to characterise the OS primary cells.

|                                | Analysis on paraffin embedded primary OS cells | Staining                   | Immunocytochemistry  |
|--------------------------------|------------------------------------------------|----------------------------|----------------------|
| <b>Cytology</b>                | Cell density                                   | HE (Hematoxylin and eosin) |                      |
|                                | Cell atypia                                    | HE                         |                      |
|                                | Osteoid formation                              | Goldner                    |                      |
| <b>Lineage differentiation</b> | Mesenchymal Cell                               |                            | Vimentin             |
|                                | Endothelium                                    |                            | CD31                 |
|                                | Smooth muscle                                  |                            | Actin                |
|                                | Striated muscles                               |                            | Desmin               |
|                                | Macrophages                                    |                            | CD68                 |
|                                | Pan leukocytes                                 |                            | CD45                 |
|                                |                                                |                            | Cytokeratin (MNF)    |
|                                | Epithelium                                     |                            | Cytokeratin (AE 1/3) |
|                                |                                                |                            | Cytokeratin (OSCAR)  |

**Table S2.** Primer used for *ALK* sequencing

| Primer          | Sequence (5'-3')          |
|-----------------|---------------------------|
| ALK_Ex1_1_vor   | TCAGAGCCTCTTCCCATCTC      |
| ALK_Ex1_1_rev   | TTCAGCACCTTGGACAGC        |
| ALK_Ex1_2_vor   | GCTGCTCAGGTTGCTGG         |
| ALK_Ex1_2_rev   | GGTGGAAGTGAAGATTATTTAATGG |
| ALK_Ex2_vor     | GCTAAAAGACACACCCCAAGC     |
| ALK_Ex2_rev     | TCCCAAACCTGAACTCACAGAG    |
| ALK_Ex3_vor     | GCCAACCTCCTAGTGTGGAG      |
| ALK_Ex3_rev     | TATTCACGCTGGCCCTG         |
| ALK_Ex4_vor     | CCACAGAGCTACTGCTGGTC      |
| ALK_Ex4_rev     | ACCAAAAGCCAAATCACCTG      |
| ALK_Ex5_vor     | GTGCCCATGAAGAATGTGAG      |
| ALK_Ex5_rev     | TAAGTGTGCACATTCCCAGC      |
| ALK_Ex6_vor     | GGACCAACCCATCAGGC         |
| ALK_Ex6_rev     | GGGTTATGAGCATGGGCTG       |
| ALK_Ex7_vor     | TAATTCGACTTGGCATTGGC      |
| ALK_Ex7_rev     | TCCCATCTGTCTATGTGGGC      |
| ALK_Ex8_vor     | TGCACAGTCCATTAACCCTG      |
| ALK_Ex8_rev     | AAGTGACAAGAGGTGGGAGG      |
| ALK_Ex9_vor     | CAGTGGAGAATTCCAGAAAGG     |
| ALK_Ex9_rev     | TGTGTGTCTTGGGTAAAAGGC     |
| ALK_Ex10-11_vor | TGCTGGATGCTGAATCCTAAG     |
| ALK_Ex10-11_rev | GCACCAATCTTTCTTCTGCC      |
| ALK_Ex12_vor    | AGATATCTCAGAGGCCACCC      |
| ALK_Ex12_rev    | CAGGCTTCTTCGGAAGGG        |
| ALK_Ex13_vor    | GGAAGCTGCTGGGTTGG         |
| ALK_Ex13_rev    | CTCCAAGAGGCCTTCCC         |
| ALK_Ex14_vor    | TTCTGTCTGCTGCAAAGTGG      |
| ALK_Ex14_rev    | CCAGGGCTGTCATGAGG         |
| ALK_Ex15_vor    | TTTACCAGAGCTTAGGGGCTC     |
| ALK_Ex15_rev    | AGCTGAAGGCCTGGGAG         |
| ALK_Ex16_vor    | CCTGCATCCTGCTTCTCTG       |
| ALK_Ex16_rev    | TGAGGAGCCTAGGACTAAGCAG    |
| ALK_Ex17_vor    | TTAAGATTTTGGCACCCACC      |
| ALK_Ex17_rev    | CTTGGTGGGAGGACTGACC       |
| ALK_Ex18_vor    | ACTGAGGCTGGGAGTGGG        |
| ALK_Ex18_rev    | AAACCATTGTGGTCATGGG       |
| ALK_Ex19_vor    | TTGGGACCAACTCAAAGGAG      |

---

|                 |                          |
|-----------------|--------------------------|
| ALK_Ex19_rev    | CACTATTCAGTCCTGCCTTCC    |
| ALK_Ex20_vor    | TTCCTGTAGGAAGTGGCCTG     |
| ALK_Ex20_rev    | AACATTCAGCCCCTACACTG     |
| ALK_Ex21-22_vor | GCCTCATTATTGTGGCCTG      |
| ALK_Ex21-22_rev | GGAGATATCGATCTGTTAGAAACC |
| ALK_Ex23_vor    | TTCCTCCCAGTTTAAGATTTC    |
| ALK_Ex23_rev    | CTTCCATCCTTGCTCCTGTC     |
| ALK_Ex24_vor    | AGCATTTACAGATTCCCTCC     |
| ALK_Ex24_rev    | CTTGAGATCTGCGGGGAAG      |
| ALK_Ex25_vor    | GTGATGGCCGTTGTACACTC     |
| ALK_Ex25_rev    | ATTCTTGAGGGGCTGAGGTG     |
| ALK_Ex26_vor    | AGCAGGGCAGATGCTTAATG     |
| ALK_Ex26_rev    | CCAGGAGCACCACTTATG       |
| ALK_Ex27_vor    | AATGTGGGTGGGTGTGTC       |
| ALK_Ex27_rev    | AAGAAGCATATGTGGCTCTGG    |
| ALK_Ex28_vor    | ACGTATTCGTTGCAACCCTG     |
| ALK_Ex28_rev    | TTGTACTCTGACTGGCTTGACC   |
| ALK_Ex29_1_vor  | TTTGTATGCCCCAGTGCC       |
| ALK_Ex29_1_rev  | CAGTACAGCTTCCCTCCAGC     |
| ALK_Ex29_2_vor  | TTCTCTCAGTCCAACCCTCC     |
| ALK_Ex29_2_rev  | CTCTGGTTTGTGAAGGAGCC     |
| ALK1_Ex29_3_vor | CCTGGAGCTGGTCATTACG      |
| ALK1_Ex29_3_rev | CTCAAATGGCTCATGTCCAC     |

---
