# Supplementary figures and images for: Safety and Activity of the Combination of Ceritinib and Dasatinib in Osteosarcoma
Source: MDPI journal article supplement (doi:10.3390/cancers12040793), 2020-03-26

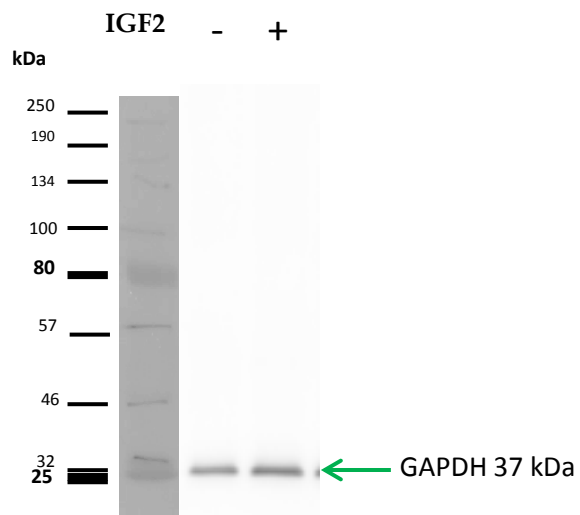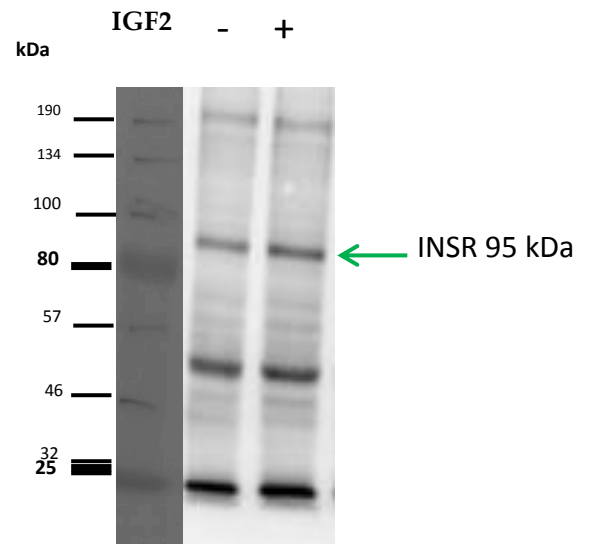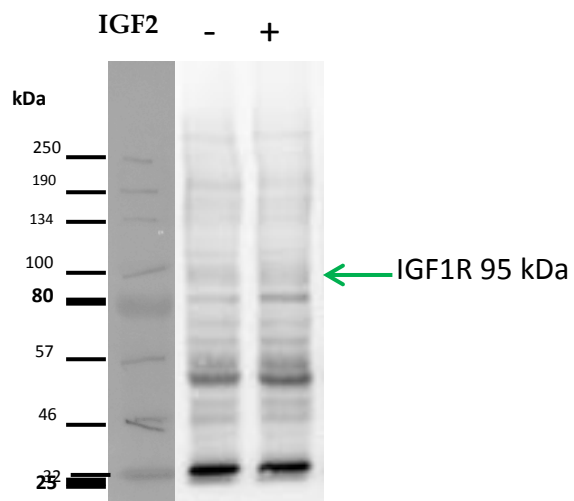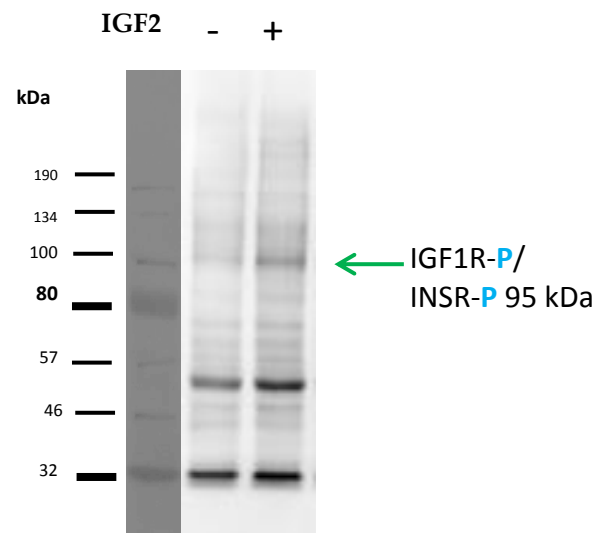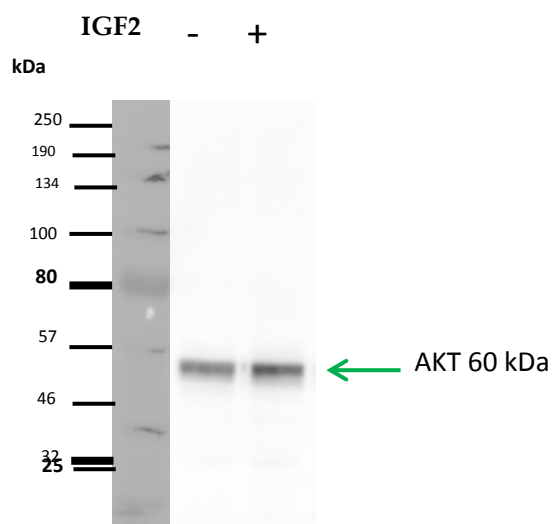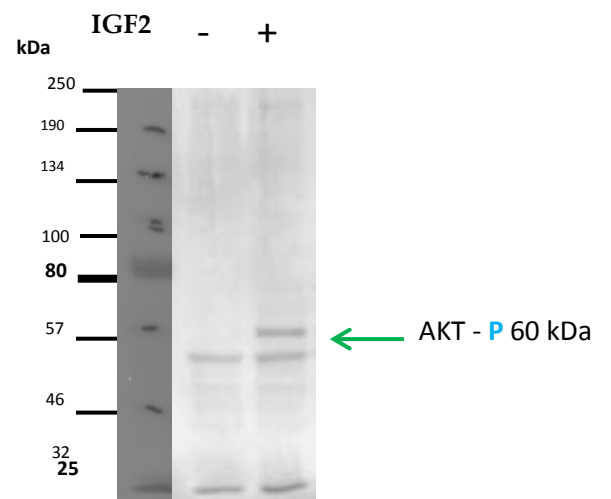

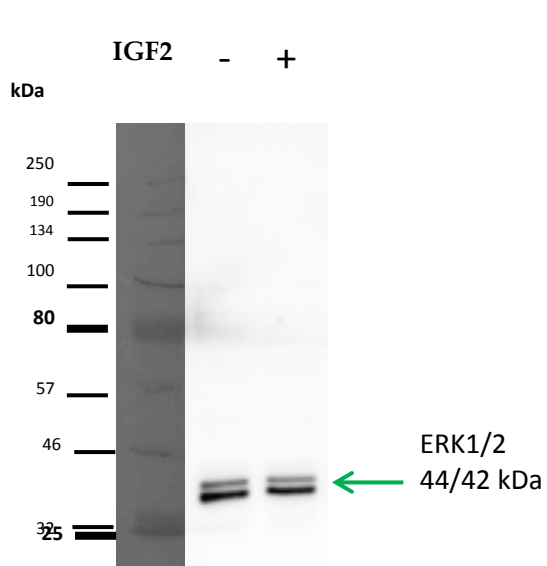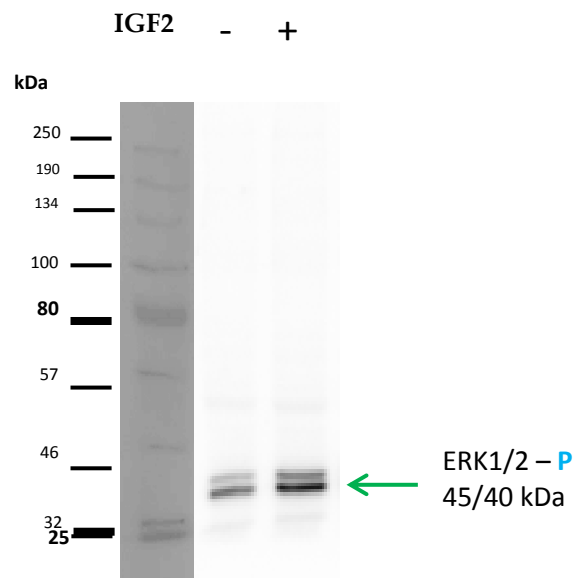

ERK 1/ERK 2 (44/42  
kDa) was stained  
before

P- ERK 1/ERK 2 (45/40  
kDa) was stained  
before

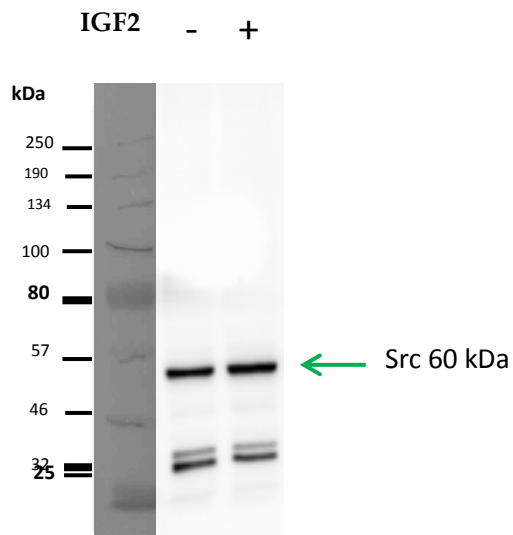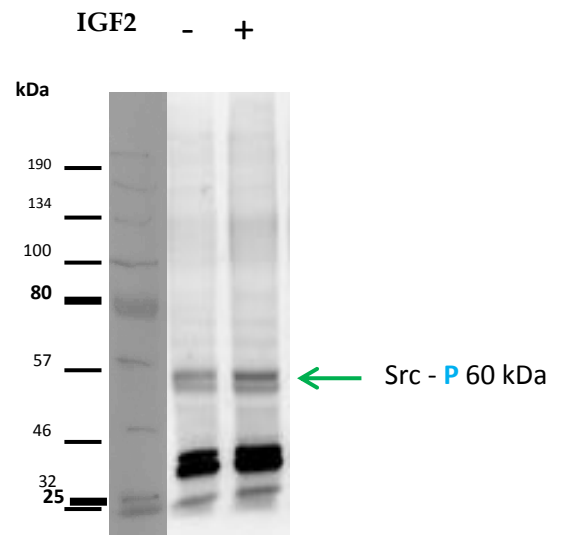

Supplement: s1 [file s1]
